# Supplementary material for: Heterozygous truncating variant of TAOK1 in a boy with periventricular nodular heterotopia: a case report and literature review of TAOK1-related neurodevelopmental disorders
Source: PubMed Central journal article supplement (PMC10916022; doi:10.1186/s12920-024-01840-8), 2024-03-05
Supplement: 12920_2024_1840_MOESM2_ESM.pdf [file 12920_2024_1840_MOESM2_ESM.pdf]

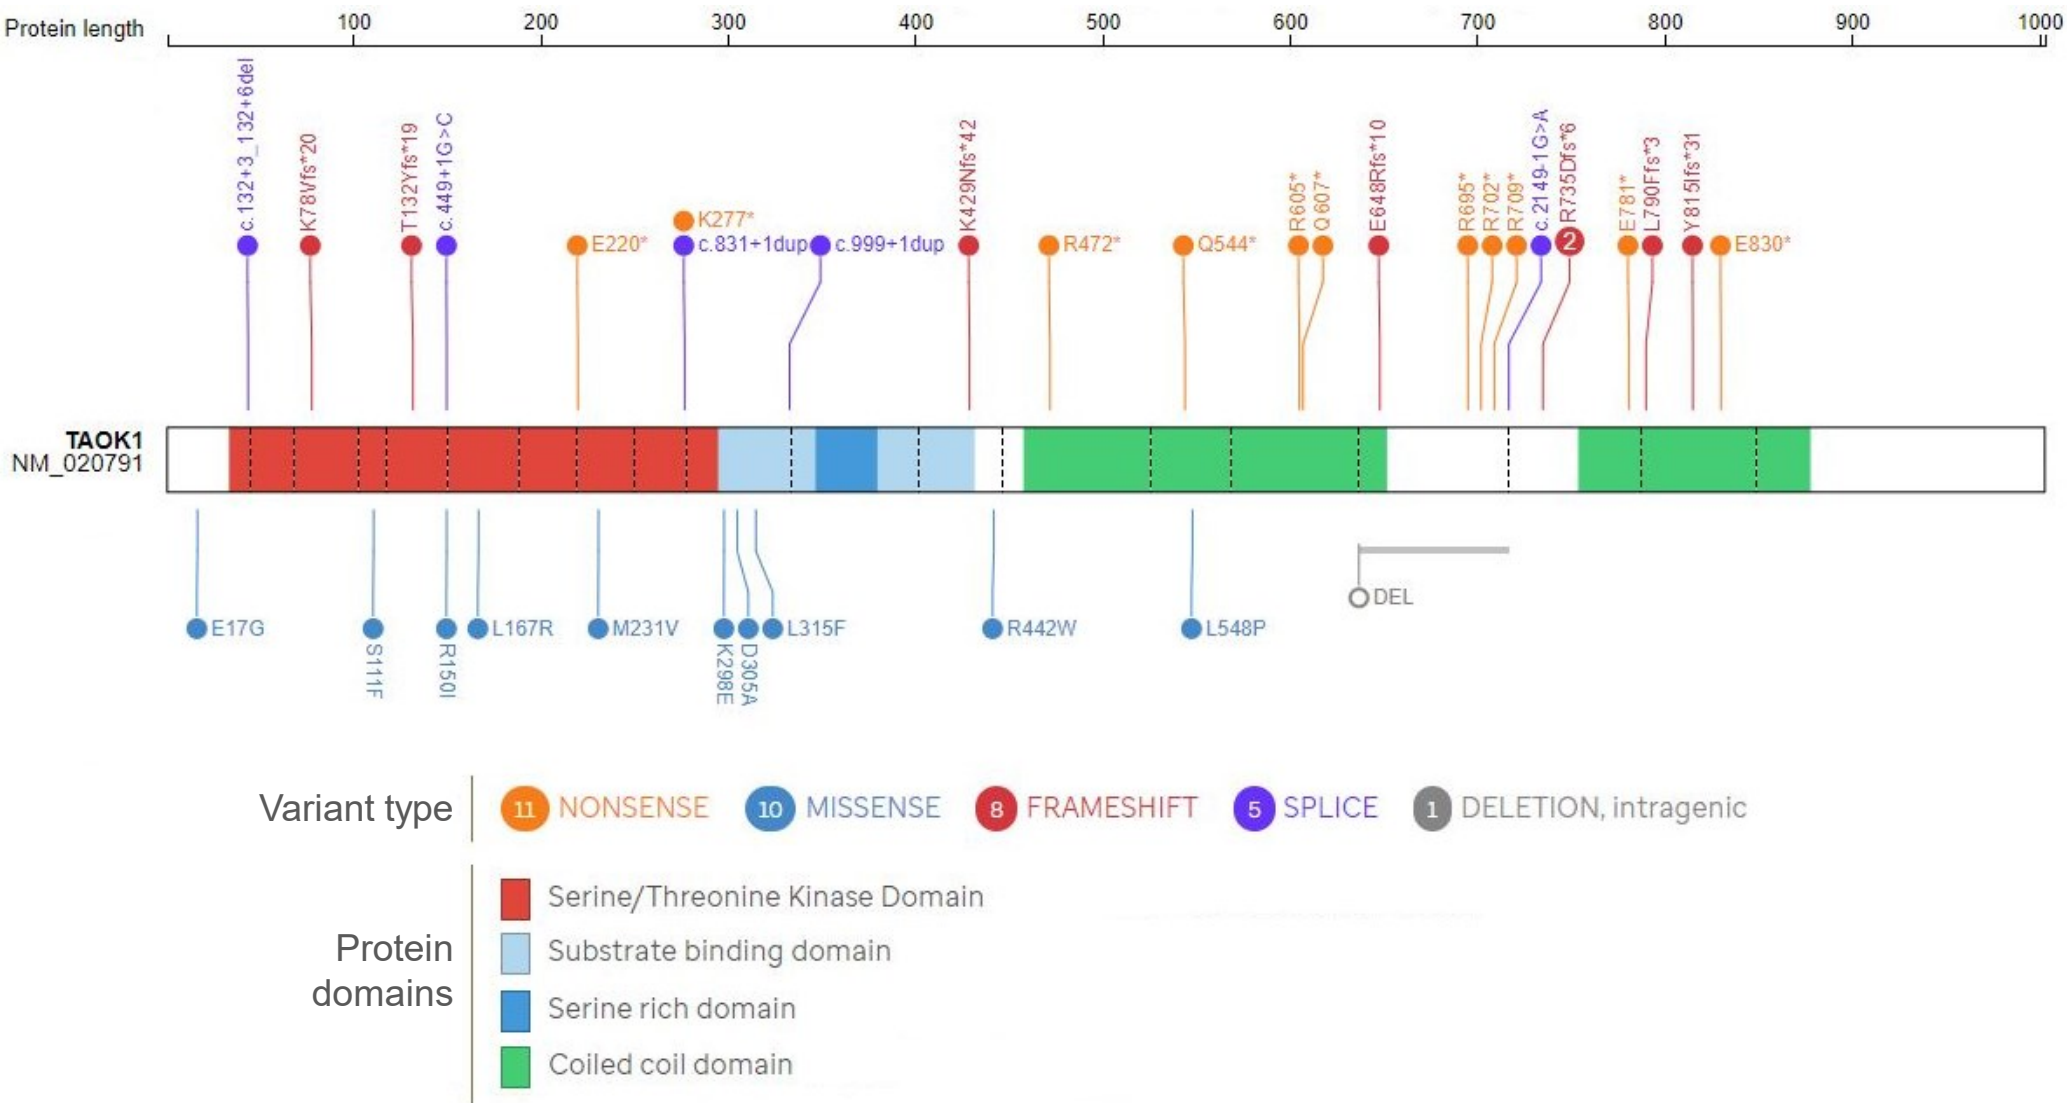

**Supplementary Figure 1** – Scheme representing the TAOK1 protein and the variants from individuals with TAOK1-related disease (from Supplementary Table 1). Three whole gene deletions were not shown. Dashed vertical lines represent exon-exon boundaries. Graphics made with ProteinPaint (<https://www.nature.com/articles/ng.3466>).
